# Supplementary material for: Predictors of eHealth Literacy and Its Associations with Preventive Behaviors, Fear of COVID-19, Anxiety, and Depression among Undergraduate Nursing Students: A Cross-Sectional Survey
Source: MDPI journal article supplement (doi:10.3390/ijerph19073766), 2022-03-22
Supplement: s1 [file s1]

# Predictors of eHealth Literacy and Its Associations with Preventive Behaviors, Fear of COVID-19, Anxiety, and Depression among Undergraduate Nursing Students: A Cross-sectional Survey

|                                                                                                                   |   |
|-------------------------------------------------------------------------------------------------------------------|---|
| <b>Text S1.</b> The margin of error calculation .....                                                             | 2 |
| <b>Table S1.</b> Associated factors of preventive behaviors (n= 1851). ....                                       | 3 |
| <b>Table S2.</b> Associated factors of fear of COVID-19, anxiety, depression (n= 1851). ....                      | 4 |
| <b>Table S3.</b> Spearman’s correlation (rho) between independent variables among nursing students (n= 1851)..... | 5 |

**Text S1.** The margin of error calculation

We calculated the margin of error (MOE) of the sample size for the eHEALS mean. Because the population standard deviation (SD) of eHEALS was unknown, the MOE with a 95% confidence interval (CI) was calculated based on the standard error of the sample mean according to a formula:

$$\text{MOE} = 1.96 * \frac{s}{\sqrt{n}} \quad (1)$$

where 1.96 was the critical value (z-score) for 95% confidence level,  $\frac{s}{\sqrt{n}}$  was the standard error of the sample mean with s was the sample SD of eHEALS, and n was the sample size. As a result, the MOE for the eHEALS mean with a 95% CI is  $1.96 * \frac{4.4}{\sqrt{1851}} = 0.20$ . It means that with a 95% confidence level, the sample mean of eHEALS will differ  $\pm 0.2$  from the mean of eHEALS in the real population.

**Table S1.** Associated factors of preventive behaviors (n= 1851).

| Variable                      | Handwashing       |          | Mask-wearing      |          | Physical distancing |          |
|-------------------------------|-------------------|----------|-------------------|----------|---------------------|----------|
|                               | OR (95% CI)       | <i>p</i> | OR (95% CI)       | <i>p</i> | OR (95% CI)         | <i>p</i> |
| Age, one-score increment      | 0.96 (0.89, 1.05) | 0.408    | 0.92 (0.86, 0.99) | 0.039    | 0.81 (0.73, 0.90)   | <0.001   |
| Gender                        |                   |          |                   |          |                     |          |
| Female                        | Ref.              |          | Ref.              |          | Ref.                |          |
| Male                          | 0.84 (0.54, 1.29) | 0.428    | 1.05 (0.72, 1.52) | 0.796    | 0.90 (0.53, 1.52)   | 0.690    |
| Ability to pay for medication |                   |          |                   |          |                     |          |
| Very or fairly difficult      | Ref.              |          | Ref.              |          | Ref.                |          |
| Very or fairly easy           | 1.36 (1.09, 1.68) | 0.005    | 1.19 (0.99, 1.44) | 0.064    | 1.22 (0.94, 1.58)   | 0.127    |
| Academic year                 |                   |          |                   |          |                     |          |
| 1 – 2                         | Ref.              |          | Ref.              |          | Ref.                |          |
| 3 – 4                         | 0.94 (0.76, 1.16) | 0.587    | 0.88 (0.73, 1.06) | 0.188    | 0.65 (0.49, 0.84)   | 0.001    |
| COVID-19-like symptoms        |                   |          |                   |          |                     |          |
| No                            | Ref.              |          | Ref.              |          | Ref.                |          |
| Yes                           | 0.76 (0.58, 1.00) | 0.053    | 1.17 (0.93, 1.48) | 0.181    | 0.52 (0.36, 0.76)   | 0.001    |
| Comorbidity                   |                   |          |                   |          |                     |          |
| No                            | Ref.              |          | Ref.              |          | Ref.                |          |
| Yes                           | 0.71 (0.41, 1.21) | 0.204    | 0.63 (0.41, 0.96) | 0.032    | 0.20 (0.06, 0.63)   | 0.006    |
| BMI, kg/m <sup>2</sup>        |                   |          |                   |          |                     |          |
| Underweight                   | 0.98 (0.78, 1.23) | 0.838    | 0.83 (0.68, 1.01) | 0.063    | 0.86 (0.64, 1.14)   | 0.289    |
| Normal weight                 | Ref.              |          | Ref.              |          | Ref.                |          |
| Overweight/obese              | 0.77 (0.36, 1.62) | 0.489    | 0.93 (0.50, 1.73) | 0.831    | 0.89 (0.37, 2.12)   | 0.787    |

Abbreviations: OR, odds ratio; CI, confidence interval.

**Table S2.** Associated factors of fear of COVID-19, anxiety, depression (n= 1851).

| Variable                      | Fear of COVID-19    |          | Anxiety           |          | Depression        |          |
|-------------------------------|---------------------|----------|-------------------|----------|-------------------|----------|
|                               | B (95% CI)          | <i>p</i> | OR (95% CI)       | <i>p</i> | OR (95% CI)       | <i>p</i> |
| Age, 1-score increment        | -0.16 (-0.33, 0.02) | 0.074    | 0.95 (0.82, 1.10) | 0.484    | 1.02 (0.91, 1.14) | 0.776    |
| Gender                        |                     |          |                   |          |                   |          |
| Female                        | Ref.                |          | Ref.              |          | Ref.              |          |
| Male                          | -0.86 (-1.73, 0.01) | 0.051    | 1.09 (0.54, 2.20) | 0.815    | 1.35 (0.81, 2.25) | 0.248    |
| Ability to pay for medication |                     |          |                   |          |                   |          |
| 1 – 2                         | Ref.                |          | Ref.              |          | Ref.              |          |
| 3 – 4                         | 0.74 (0.14, 1.35)   | 0.015    | 1.12 (0.69, 1.81) | 0.642    | 0.99 (0.67, 1.46) | 0.954    |
| Academic year                 |                     |          |                   |          |                   |          |
| 1-2                           | Ref.                |          | Ref.              |          | Ref.              |          |
| 3-4                           | -0.33 (-0.77, 0.11) | 0.146    | 0.79 (0.54, 1.15) | 0.212    | 1.04 (0.78, 1.38) | 0.806    |
| COVID-19-like symptoms        |                     |          |                   |          |                   |          |
| No                            | Ref.                |          | Ref.              |          | Ref.              |          |
| Yes                           | -0.05 (-0.59, 0.49) | 0.852    | 2.99 (2.04, 4.37) | <0.001   | 2.76 (2.05, 3.73) | <0.001   |
| Comorbidity                   |                     |          |                   |          |                   |          |
| No                            | Ref.                |          | Ref.              |          | Ref.              |          |
| Yes                           | -0.48 (-1.51, 0.55) | 0.362    | 2.12 (1.09, 4.09) | 0.026    | 3.41 (2.11, 5.52) | <0.001   |
| BMI, kg/m <sup>2</sup>        |                     |          |                   |          |                   |          |
| Underweight                   | -0.36 (-0.84, 0.11) | 0.132    | 0.84 (0.55, 1.26) | 0.397    | 0.74 (0.54, 1.03) | 0.073    |
| Normal weight                 | Ref.                |          | Ref.              |          | Ref.              |          |
| Overweight/obese              | -1.08 (-2.53, 0.37) | 0.146    | 1.37 (0.48, 3.91) | 0.561    | 1.09 (0.46, 2.64) | 0.835    |

Abbreviations: B, unstandardized regression coefficient; OR, odds ratio; CI, confidence interval.

**Table S3.** Spearman's correlation (rho) between independent variables among nursing students (n= 1851).

| Variables      | Age         | Gender | Academic year | Ability to pay | S-COVID-19-S | Comorbidities |
|----------------|-------------|--------|---------------|----------------|--------------|---------------|
| Gender         | -.055       |        |               |                |              |               |
| Academic year  | <b>.863</b> | -.063  |               |                |              |               |
| Ability to pay | -.062       | .049   | -.063         |                |              |               |
| S-COVID-19-S   | -.017       | .021   | -.007         | -.057          |              |               |
| Comorbidities  | .031        | .058   | .046          | -.014          | .175         |               |
| BMI            | -.020       | .041   | .016          | -.001          | .050         | .048          |

Abbreviation: S-COVID-19-S, COVID-19-like symptoms.
